# Supplementary material for: The electrocatalytic N2 reduction activity of core–shell iron nanoalloy catalysts: a density functional theory (DFT) study
Source: Royal Society of Chemistry journal article supplement (doi:10.1039/d3cp03453d), 2023-01-01
Supplement: d3cp03453d1.pdf [file d3cp03453d1.pdf]

**Supplementary Information**

**Electrocatalytic N<sub>2</sub> Reduction Activity of Core-Shell Iron Nanoalloy Catalysts**

**– A Density Functional Theory (DFT) Study**

Arunendu Das,<sup>†</sup> Sandeep Das,<sup>†</sup> and Biswarup Pathak<sup>\*,†</sup>

<sup>†</sup>Department of Chemistry, Indian Institute of Technology Indore, Indore 453552, India

\*Email: [biswarup@iiti.ac.in](mailto:biswarup@iiti.ac.in)

**Table S1.** Calculated values of cohesive and formation energy, core-shell interaction energy (CSIE), average Fe-Fe and Fe-M bond length in Å and magnetic moment ( $\mu_B/\text{atom}$ ) for all clusters considered.

| Systems          | Cohesive energy (eV) | Formation energy (eV) | CSIE (eV) | Average bond length (Å) |                   | Magnetic Moment ( $\mu_B/\text{atom}$ ) |
|------------------|----------------------|-----------------------|-----------|-------------------------|-------------------|-----------------------------------------|
|                  |                      |                       |           | Fe-Fe in shell          | Fe(shell)-M(core) |                                         |
| Co@Fe            | -4.25                | 1.20                  | -0.80     | 2.407                   | 2.359             | 2.66                                    |
| Ni@Fe            | -4.08                | 1.25                  | -0.62     | 2.402                   | 2.394             | 2.42                                    |
| Cu@Fe            | -3.74                | 1.33                  | -0.48     | 2.397                   | 2.436             | 2.23                                    |
| Fe <sub>65</sub> | -4.20                | 1.19                  | -0.65     | 2.407                   | 2.398             | 2.79                                    |

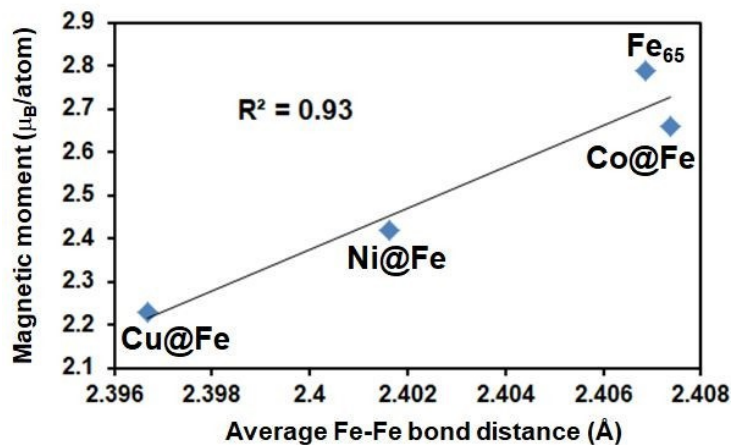

**Figure S1.** Magnetic moment ( $\mu_B/\text{atom}$ ) plotted against average Fe-Fe bond distance (Å) for all clusters considered.

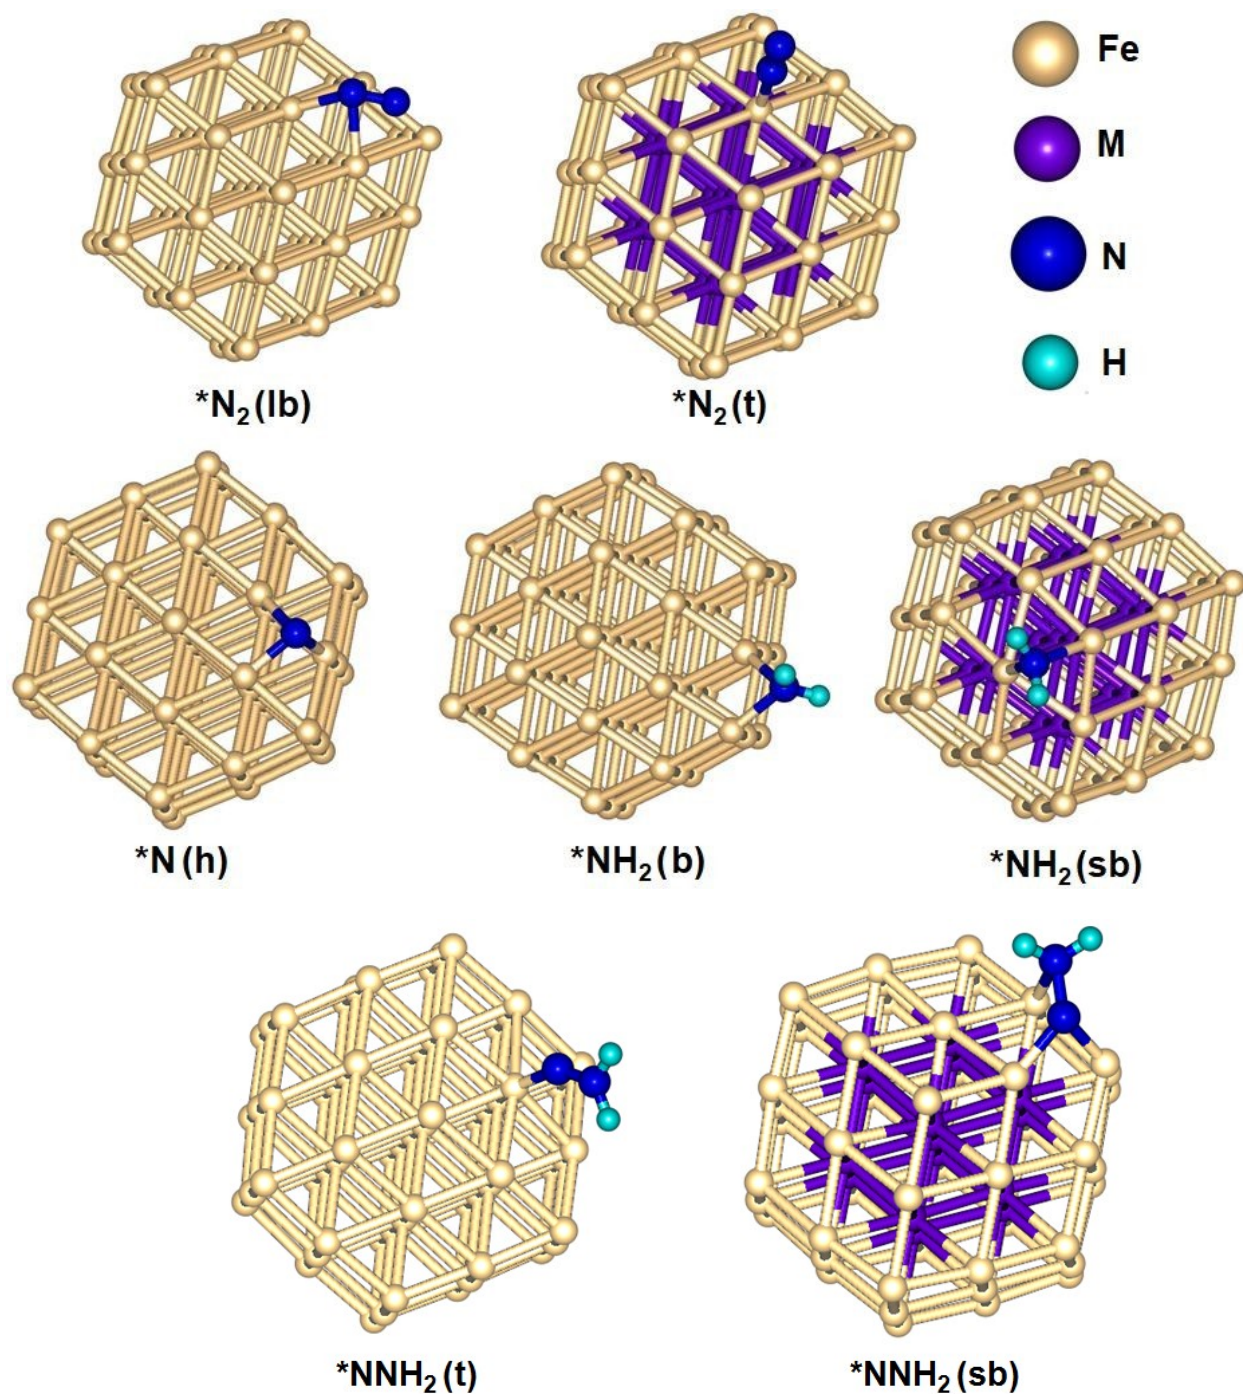

**Figure S2.** Possible adsorption sites (lb, t, h, b, sb) over (110) facet of  $\text{Fe}_{65}$  and  $\text{M@Fe}$  clusters for adsorbed species. Adsorbed  $^*\text{N}_2$  with side on [ $^*\text{N}_2(\text{lb})$ ] and end-on fashion [ $^*\text{N}_2(\text{t})$ ], adsorbed  $^*\text{N}$ ,  $^*\text{NH}_2$  and  $^*\text{NH}_2$  at hollow (h), bridge (b) and short-bridge (sb) sites, adsorbed  $^*\text{NNH}_2$  at top (t) and short-bridge (sb) sites, respectively.

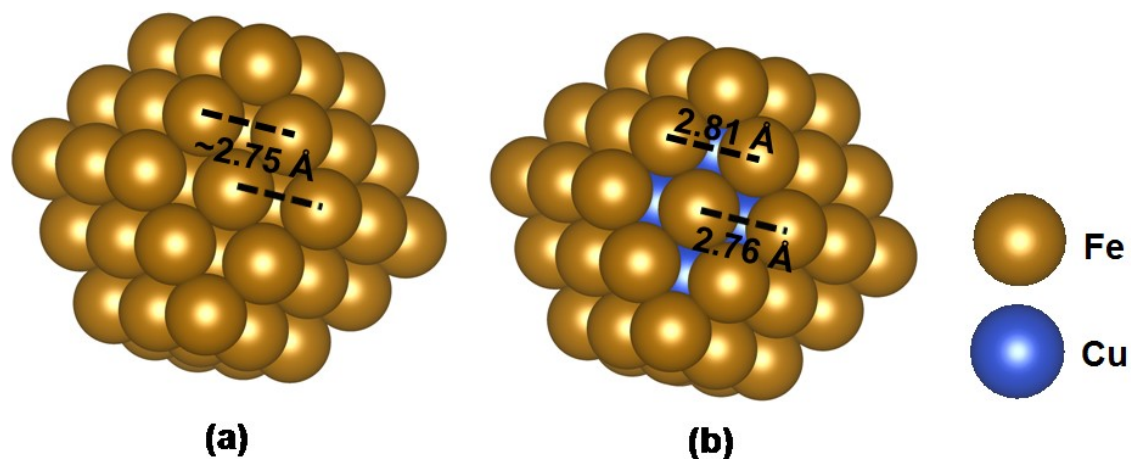

**Figure S3.** Bond distances at short-bridge (sb) active sites on (a) Fe<sub>65</sub> NC and (b) Cu@Fe NC.

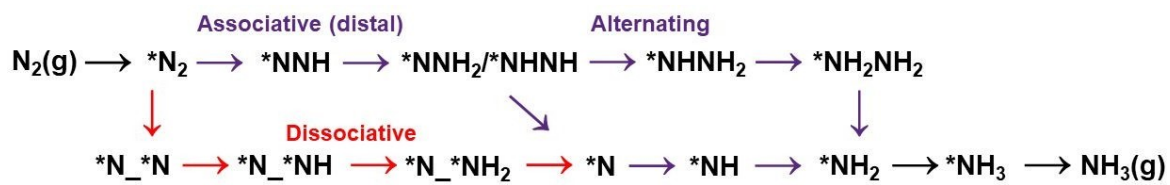

**Figure S4.** Possible elementary mechanisms of N<sub>2</sub> reduction to NH<sub>3</sub> include dissociative and associative (distal and alternating) mechanism.<sup>1-3</sup>

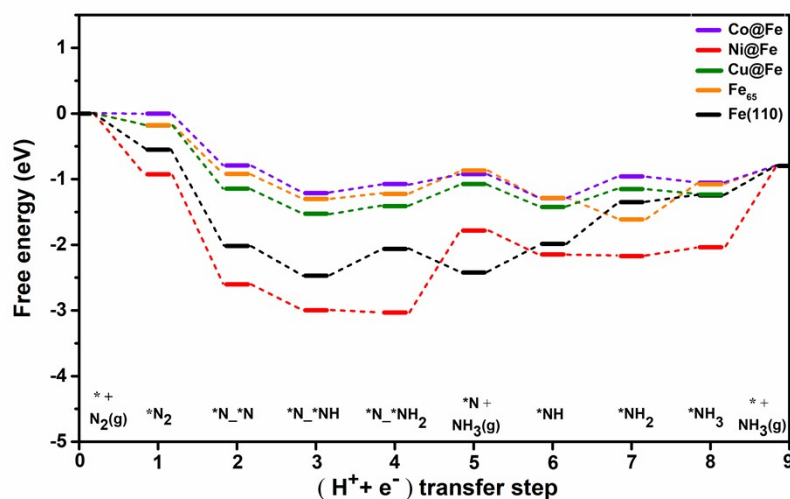

**Figure S5.** Reaction free energy diagram for the dissociative mechanism without applied bias ( $U=0\text{ V}$ ).<sup>4</sup>

**Table S2.**  $\Delta G_{\text{max}}$  values with PDS, working potential ( $U_{\text{work}}$ ) following dissociative and associative pathway for all the considered clusters and reported catalysts.<sup>4</sup>

| Pathway            | Systems                           | PDS                                                                                                 | $\Delta G_{\text{max}}$ (eV) | Working potential $U_{\text{work}} = [-\Delta G_{\text{max}}/e \text{ in V}]$ |
|--------------------|-----------------------------------|-----------------------------------------------------------------------------------------------------|------------------------------|-------------------------------------------------------------------------------|
| Dissociative       | Co@Fe                             | $*\text{NH} + (\text{H}^+ + \text{e}^-) \rightarrow *\text{NH}_2$                                   | 0.33                         | -0.33                                                                         |
|                    | Ni@Fe                             | $*\text{N}_-\text{*NH}_2 + (\text{H}^+ + \text{e}^-) \rightarrow *\text{N} + \text{NH}_3(\text{g})$ | 1.25                         | -1.25                                                                         |
|                    | Cu@Fe                             | $*\text{N}_-\text{*NH}_2 + (\text{H}^+ + \text{e}^-) \rightarrow *\text{N} + \text{NH}_3(\text{g})$ | 0.34                         | -0.34                                                                         |
|                    | Fe <sub>65</sub>                  | $*\text{NH}_2 + (\text{H}^+ + \text{e}^-) \rightarrow *\text{NH}_3$                                 | 0.53                         | -0.53                                                                         |
|                    | Fe(110) <sup>4</sup>              | $*\text{N}_-\text{*NH}_2 + (\text{H}^+ + \text{e}^-) \rightarrow *\text{N} + \text{NH}_3(\text{g})$ | 0.51                         | -0.51                                                                         |
|                    | Fe <sub>85</sub> -NC <sup>4</sup> | $*\text{NH}_2_-\text{*NH}_2 + (\text{H}^+ + \text{e}^-) \rightarrow *\text{NH}_2 + \text{NH}_3$     | 0.45                         | -0.45                                                                         |
| Distal Associative | Co@Fe                             | $*\text{NH} + (\text{H}^+ + \text{e}^-) \rightarrow *\text{NH}_2$                                   | 0.33                         | -0.33                                                                         |
|                    | Ni@Fe                             | $*\text{N}_2 + (\text{H}^+ + \text{e}^-) \rightarrow *\text{N}_2\text{H}$                           | 0.94                         | -0.94                                                                         |
|                    | Cu@Fe                             | $*\text{NH} + (\text{H}^+ + \text{e}^-) \rightarrow *\text{NH}_2$                                   | 0.27                         | -0.27                                                                         |
|                    | Fe <sub>65</sub>                  | $*\text{NNH} + (\text{H}^+ + \text{e}^-) \rightarrow *\text{NNH}_2$                                 | 1.06                         | -1.06                                                                         |
|                    | Fe(110) <sup>4</sup>              | $*\text{NH} + (\text{H}^+ + \text{e}^-) \rightarrow *\text{NH}_2$                                   | 0.50                         | -0.50                                                                         |
|                    | Fe <sub>85</sub> -NC <sup>4</sup> | $*\text{N}_2 + (\text{H}^+ + \text{e}^-) \rightarrow *\text{N}_2\text{H}$                           | 0.42                         | -0.42                                                                         |

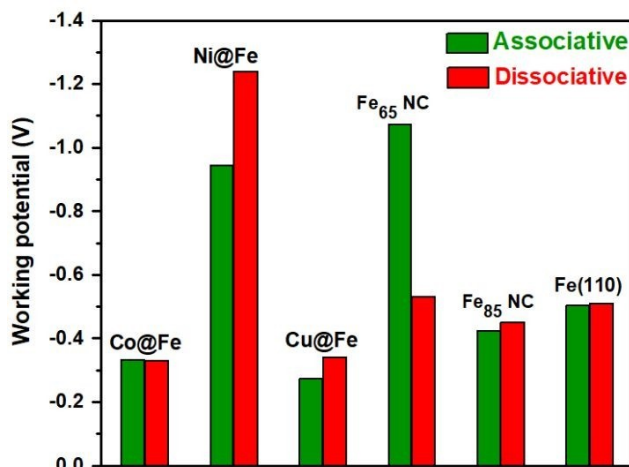

**Figure S6.** Working potential (V) for M@Fe clusters, reported Fe<sub>85</sub>NC and pristine Fe(110) following dissociative and associative pathway.<sup>4</sup>

**Table S3.** Calculation details associated with the reaction free energy change ( $\Delta G$ ) of  $^*N_2 \rightarrow ^*NNH$  for M@Fe clusters.

| Systems | $\Delta G_{^*N_2 \rightarrow ^*NNH}$ (eV) |
|---------|-------------------------------------------|
| Co@Fe   | 0.22                                      |
| Ni@Fe   | 0.95                                      |
| Cu@Fe   | 0.14                                      |

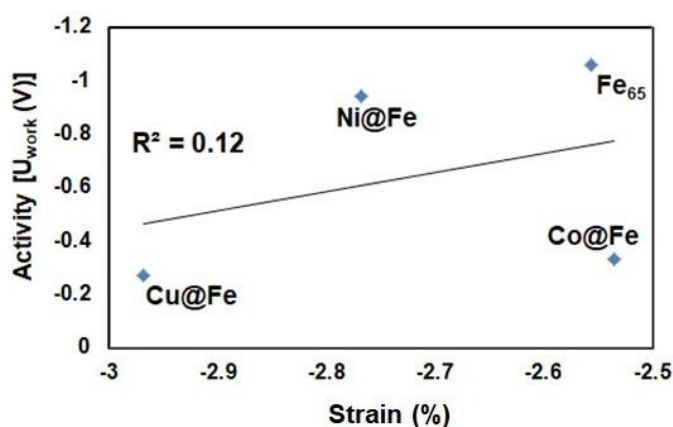

**Figure S7.** Activity [ $U_{work}$  in V] plotted against compressive strain (%) for all the considered clusters. The shortest Fe-Fe bond distance in reported pristine Fe(110) is 2.47Å.<sup>4</sup>

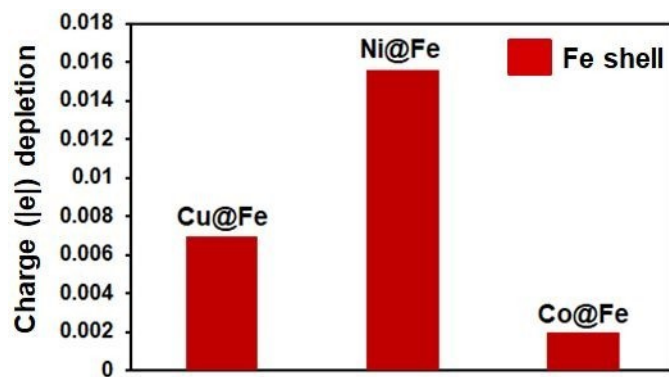

**Figure S8.** Charge depletion on Fe shell atoms obtained from Bader analysis for M@Fe clusters.

**Table S4.** Calculated values of average d-band center of outer shell Fe atoms for all the considered cluster.<sup>5</sup>

| Systems          | d-band center ( $\epsilon_{\text{Fe}}$ ) |
|------------------|------------------------------------------|
| Co@Fe            | -1.29                                    |
| Ni@Fe            | -1.26                                    |
| Cu@Fe            | -1.09                                    |
| Fe <sub>65</sub> | -1.43                                    |

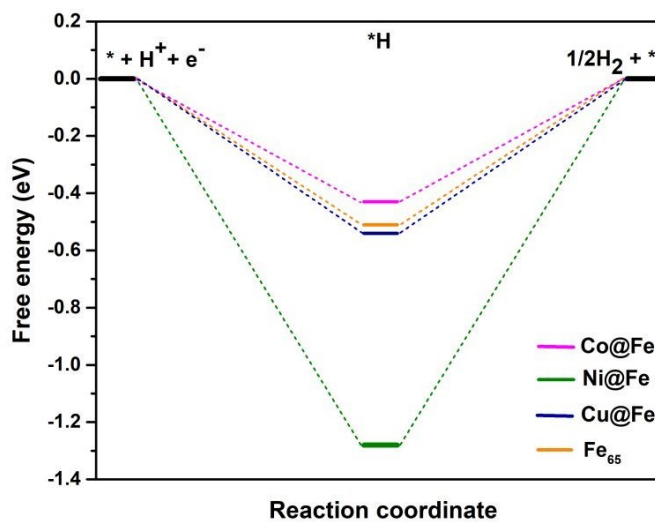

**Figure S9.** HER free energy diagram for all the considered catalysts.<sup>6,7</sup>

**Table S5.** Calculation details associated with the reaction free energy change ( $\Delta G$ ) of  $^*N_2$  and  $^*H$ , exchange current density ( $i_0$ ), NRR/HER overpotential for  $M@Fe$  and  $Fe_{65}$  NCs.

| Systems                | $\Delta G_{^*N_2}$ (eV) | $\Delta G_{^*H}$ (eV) | Exchange current density ( $i_0$ ) | Log ( $i_0/Acm^{-2}$ ) | Overpotential ( $\eta$ in V) |      |
|------------------------|-------------------------|-----------------------|------------------------------------|------------------------|------------------------------|------|
|                        |                         |                       |                                    |                        | NRR                          | HER  |
| <b>Co@Fe</b>           | -0.03                   | -0.43                 | $5.07 \times 10^{-08}$             | -7.29                  | 0.20                         | 0.43 |
| <b>Ni@Fe</b>           | -0.92                   | -1.28                 | $1.92 \times 10^{-22}$             | -21.71                 | 0.81                         | 1.28 |
| <b>Cu@Fe</b>           | -0.18                   | -0.54                 | $6.90 \times 10^{-10}$             | -9.16                  | 0.14                         | 0.54 |
| <b>Fe<sub>65</sub></b> | -0.14                   | -0.51                 | $2.22 \times 10^{-09}$             | -8.65                  | 0.40                         | 0.51 |

According to the computational hydrogen electrode (CHE) model, the  $\eta$  value can be determined by the equation as follows,

$$\begin{aligned} \eta_{NRR} &= U_{eq} - U_{work} \text{ (V)} \\ &= -0.13 - U_{work} \text{ (V)} \end{aligned}$$

where,  $U_{eq}$  is the equilibrium potential of NRR ( $-0.13$  V for  $N_2 + 6H^+ + 6e^- \rightarrow 2NH_3$ )

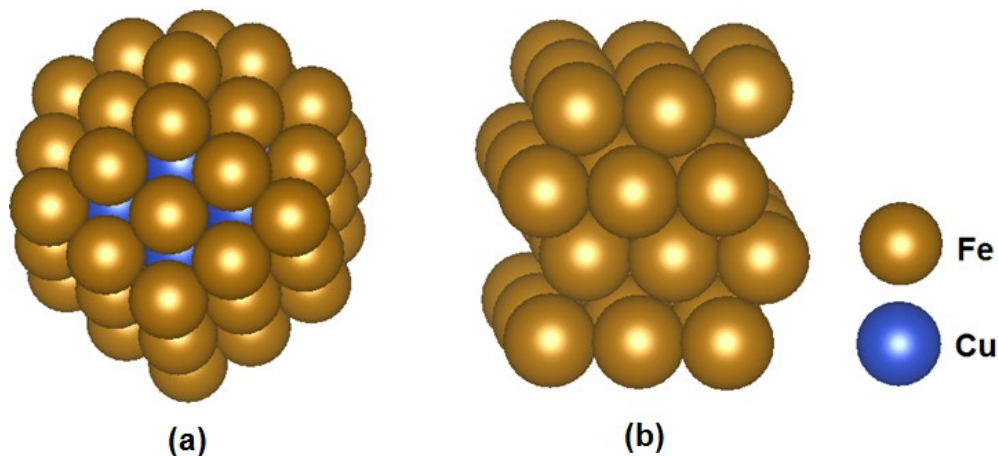

**Figure S10.** (a)  $Cu@Fe$  NC and (b) reported  $Fe(110)$  surface in defected form.<sup>4</sup>



## References

- (1) G. Ertl, *Catal. Rev.*, 1980, **21**, 201–223.
- (2) L. C. Seefeldt, B. M. Hoffman and D. R. Dean, *Annu. Rev. Biochem.*, 2009, **78**, 701–722.
- (3) M. J. Dilworth and R. R. Eady, *Biochem. J.*, 1991, **277**, 465–468.
- (4) A. Das, A. S. Nair, S. C. Mandal and B. Pathak, *ACS Appl. Nano Mater.*, 2021, **4**, 7758–7770.
- (5) J. K. Nørskov, F. Abild-Pedersen, F. Studt and T. Bligaard, *Proc. Natl. Acad. Sci.*, 2011, **108**, 937–943.
- (6) Y. Abghoui and E. Skulason, *J. Phys. Chem. C*, 2017, **121**, 6141–6151.
- (7) A. S. Nair, R. Ahuja and B. Pathak, *Nanoscale Adv.*, 2020, **2**, 2410–2421.
